# Supplementary material for: Towards pandemic preparedness: ability to estimate high-resolution social contact patterns from longitudinal surveys
Source: Research Square preprint supplement (doi:10.21203/rs.3.rs-5182601/v1), 2024-12-11
Supplement: Supplementary file 1 [file b8f588f69953e626e0b3eeb1.pdf]

## Supplementary Text S1

The regularised horseshoe (RHS) prior<sup>?</sup> defined as

$$\begin{aligned}\beta|\zeta_p, \varepsilon, c &\sim \text{Normal}(0, \varepsilon^2 \tilde{\zeta}_p^2), \quad \tilde{\zeta}_p^2 = \frac{c^2 \zeta_p^2}{c^2 + \varepsilon^2 \zeta_p^2} \\ \zeta_p &\sim \text{student-}t_{\nu_1}^+(0, 1), \quad p = 1, 2, \dots, P \\ c^2 &\sim \text{inverse-Gamma}(\nu_2, \nu_2 s^2 / 2) \\ \varepsilon &\sim \text{student-}t_{\nu_3}^+(0, \varepsilon_0),\end{aligned}$$

has the conditional mean  $\mathbb{E}[\beta_p|\varepsilon, \tilde{\zeta}_p] = 0$  and variance  $\mathbb{V}[\beta_p|\varepsilon, \tilde{\zeta}_p] = \varepsilon^2 \tilde{\zeta}_p^2$ . To constrain the horseshoe prior to the positive real domain  $\mathbb{R}^+$ , we can introduce an auxiliary random variable  $z_p \sim \text{half-Normal}^+(0, \sigma^2)$  ( $\mathbb{E}[z] = \sigma\sqrt{2/\pi}$ ,  $\mathbb{V}[z] = \sigma^2(1 - 2/\pi)$ ) and parameterise the RHS variable as  $\gamma_p = \varepsilon \tilde{\zeta}_p \times z_p$ . When  $\sigma^2 = 1$ , we can easily verify that the random variable  $\gamma_p$  has conditional mean and variance,

$$\mathbb{E}[\gamma_p|\varepsilon, \tilde{\zeta}_p] = \sqrt{\frac{2}{\pi}} \varepsilon \tilde{\zeta}_p, \quad \mathbb{V}[\gamma_p|\varepsilon, \tilde{\zeta}_p] = \left(1 - \frac{2}{\pi}\right) \varepsilon^2 \tilde{\zeta}_p^2 \approx 0.36 \mathbb{V}[\beta_p|\varepsilon, \tilde{\zeta}_p].$$

Although the distribution has a non-zero mean,  $\mathbb{E}[\gamma_p|\varepsilon, \tilde{\zeta}_p] \rightarrow 0$  as  $\varepsilon \tilde{\zeta}_p \rightarrow 0$ , *i.e.*,  $\gamma_p$  is pulled towards zero by the global shrinkage parameter  $\varepsilon$ . To ensure that the variance of the constrained parameters  $\gamma_p$  remain the same as the RHS prior, we can set the variance of the auxiliary random variable  $z$  to  $\sigma^2 = (1 - 2/\pi)^{-1}$  which gives us,

$$\mathbb{V}[\gamma_p|\varepsilon, \tilde{\zeta}_p] = \left(1 - \frac{2}{\pi}\right)^{-1} \left(1 - \frac{2}{\pi}\right) \varepsilon^2 \tilde{\zeta}_p^2 = \varepsilon^2 \tilde{\zeta}_p^2 = \mathbb{V}[\beta_p|\varepsilon, \tilde{\zeta}_p].$$

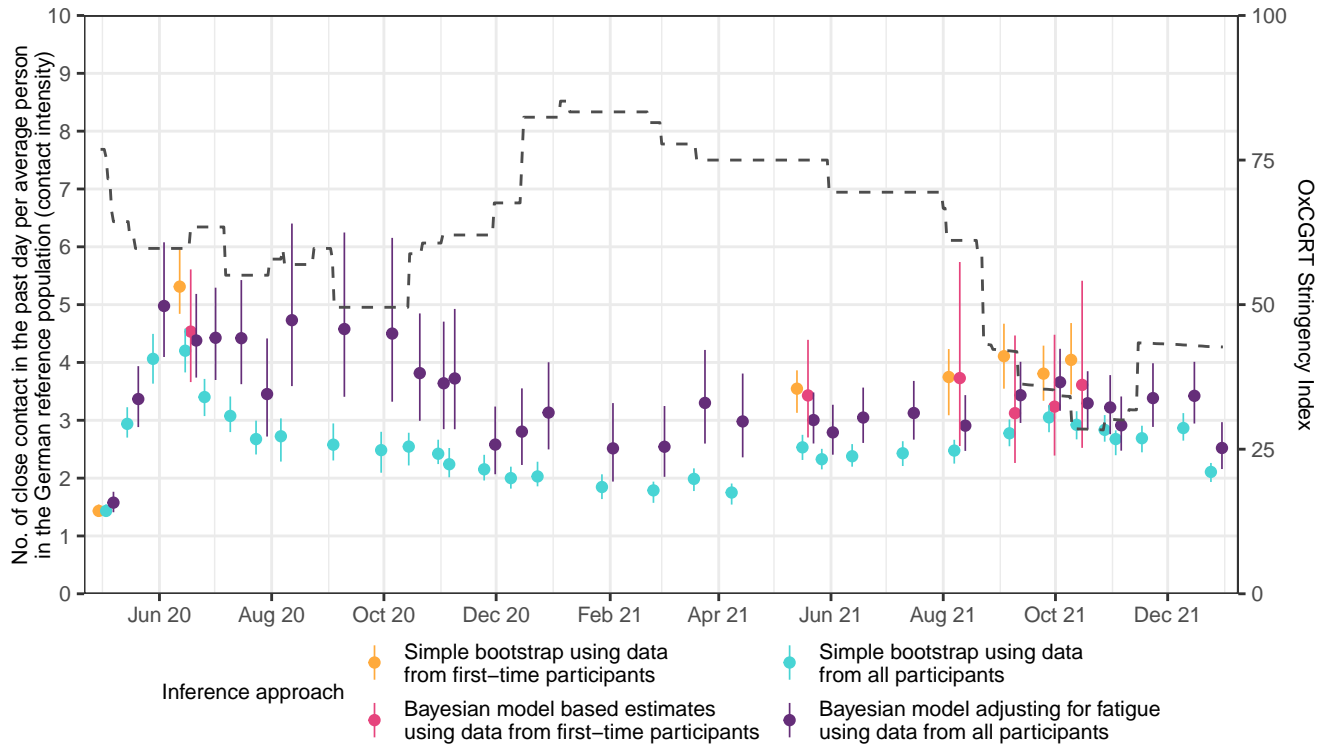

**Figure S1. Comparison between simple bootstrap based and Bayesian model based estimates for longitudinal contact intensity during the COVID-19 pandemic in Germany.**, national-level contact intensity estimates (point: simple bootstrap mean or posterior median estimate, linerange: 95% bootstrap confidence or 95% credible intervals) are shown according to different estimation approaches: Simple bootstrap<sup>2</sup> using data from first-time participants only, for waves with more than 300 first-time participants (orange); Simple bootstrap<sup>2</sup> using data from all participants and not adjusting for reporting fatigue (blue); Bayesian model using data from first-time participants only, for waves with more than 300 first-time participants (pink); Bayesian model using data from all participants and adjusting for reporting fatigue (purple). The dashed line represents the OxCGRT Stringency Index with higher values indicating a higher degree of contact restrictions (min: 0, max: 100).

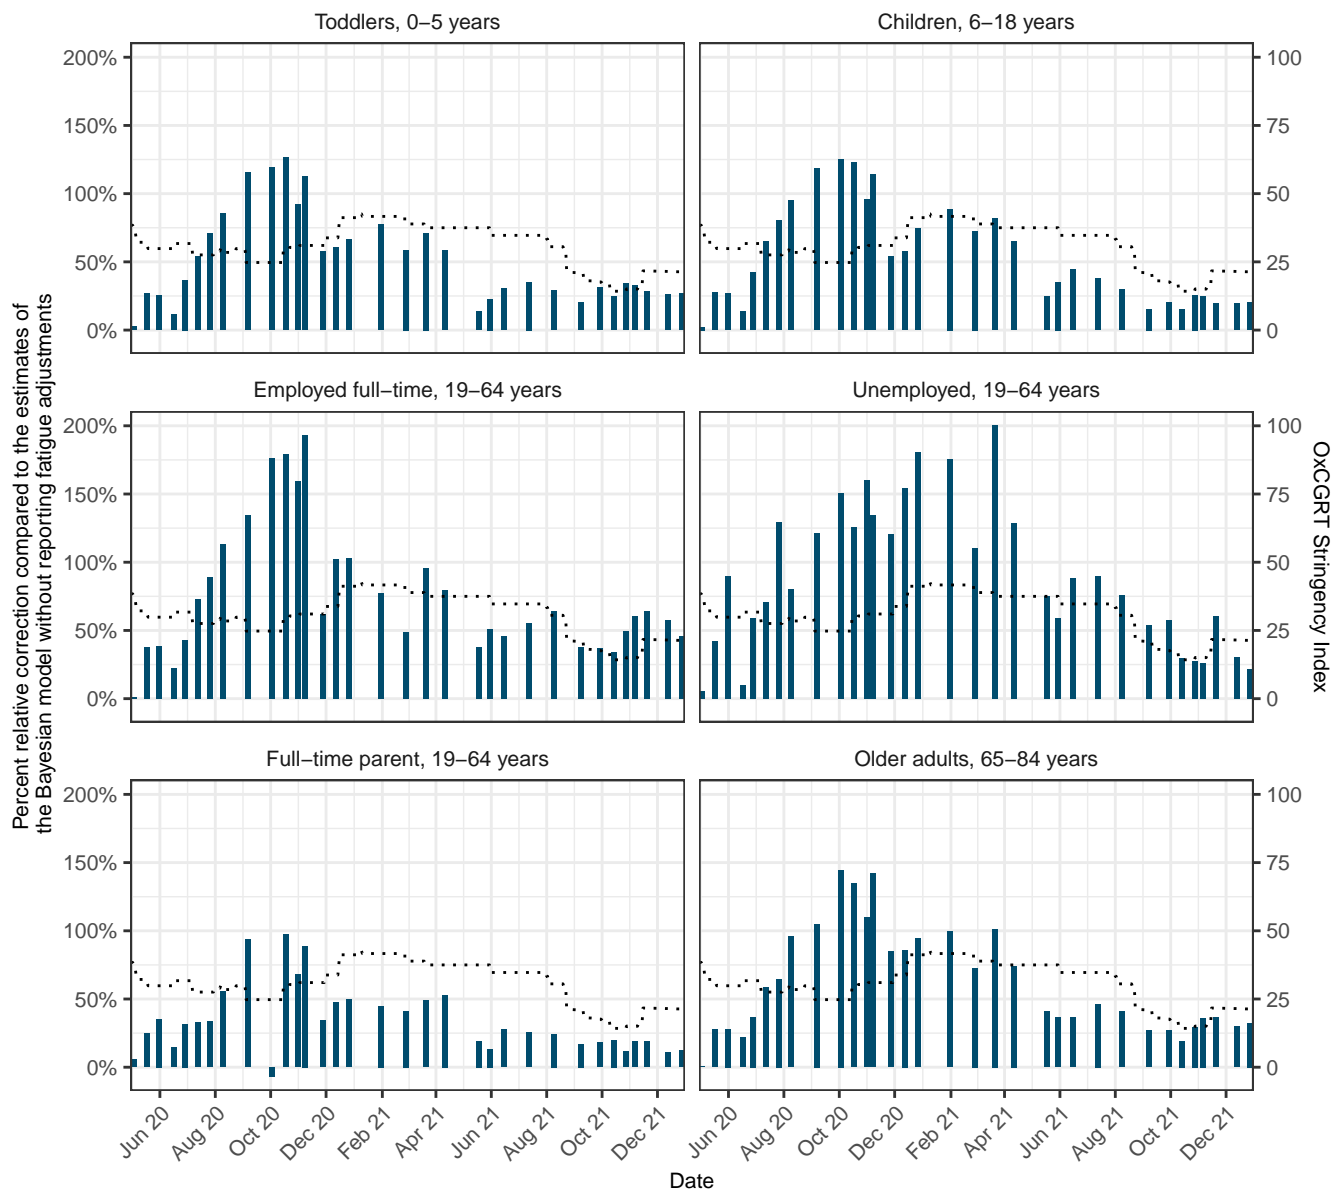

**Figure S2. Percent relative correction of contact intensity estimates from the Hill model against the Bayesian model without reporting fatigue adjustments.** Blue bars represent percent change in median contact intensity estimates from the Hill model relative to estimates from the Bayesian fatigue un-adjusted model. The dotted lines represents the OxCGRt Stringency Index with higher values indicating a higher degree of contact restrictions (min: 0, max: 100).

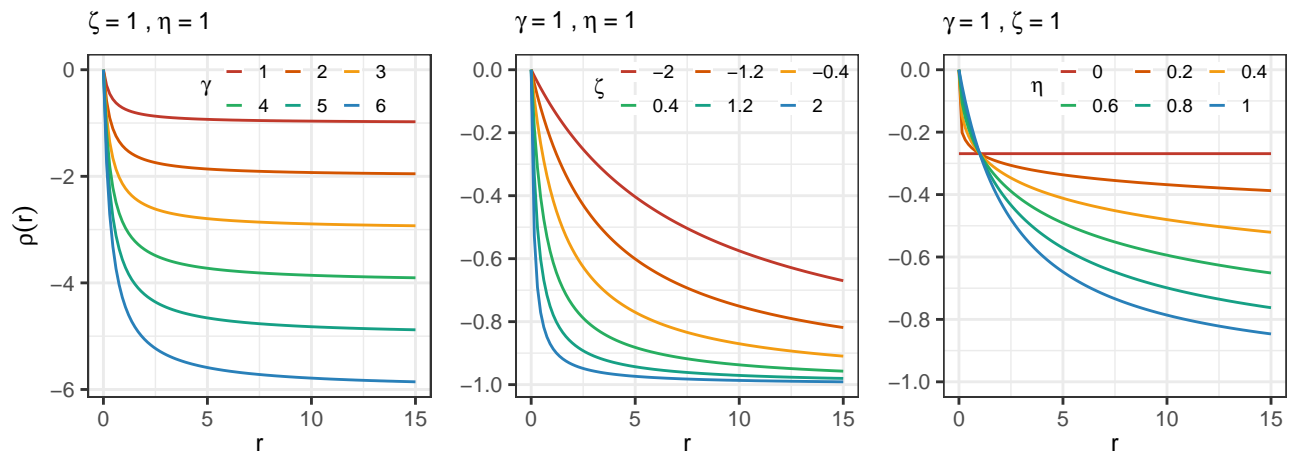

**Figure S3. Functional form of the Hill function under different parameter values.** Left: varying the scale parameter  $\gamma$  from 1 to 6 while fixing shape parameters  $\zeta$  and  $\eta$  at 1. Centre: varying the shape parameter  $\zeta$  from -2 to 2 while fixing the scale parameter  $\gamma$  and the second shape parameter  $\eta$  at 1. Right: varying the second shape parameter  $\eta$  from 0 to 1 while fixing the scale parameter  $\gamma$  and the first shape parameter  $\zeta$  at 1.
